# Supplementary material
Source: publisher site journal article supplement (https://www.spandidos-publications.com/6928/downloadSupplementary)
Supplement: Supplementary file [file downloadSupplementary]

Video S1. 2D echocardiography illustrating blood flow through the patent foramen ovale.
